# Supplementary material for: Design, synthesis, and characterization of novel eco-friendly chitosan-AgIO3 bionanocomposite and study its antibacterial activity
Source: PubMed Central journal article supplement (PMC9213402; doi:10.1038/s41598-022-14501-6), 2022-06-21
Supplement: 41598_2022_14501_MOESM1_ESM.pdf [file 41598_2022_14501_MOESM1_ESM.pdf]

**Design, synthesis, and characterization of novel eco-friendly  
chitosan-AgIO<sub>3</sub> bionanocomposite and study its antibacterial  
activity**

*Mohammad Ali Ahghari, Mohammad Reza Ahghari, Maryam Kamalzare and Ali Maleki\**

*Catalysts and Organic Synthesis Research Laboratory, Department of Chemistry, Iran*

*University of Science and Technology, Tehran 16846-13114, Iran*

*E-mail: maleki@iust.ac.ir; Fax: +98 21 73021584; Tel: +98 21 73228313*

---

## Table of contents

---

| Subject                                                                                                                                                                                                                                                                                                                                            | Page |
|----------------------------------------------------------------------------------------------------------------------------------------------------------------------------------------------------------------------------------------------------------------------------------------------------------------------------------------------------|------|
| <b>Table S1.</b> Width of inhibition zones for chitosan-AgIO <sub>3</sub> bionanocomposite against a) <i>Pseudomonas aeruginosa</i> ; b) <i>Klebsiella pneumoniae</i> ; c) <i>Staphylococcus saprophyticus</i> ; d) <i>Escherichia coli</i> ; e) <i>Staphylococcus aureus</i> bacteria compared with 0.001 g/ml penicillin for 24 h .....          | S3   |
| <b>Table S2.</b> Width of inhibition zones for chitosan-AgIO <sub>3</sub> bionanocomposite against a) <i>Pseudomonas aeruginosa</i> ; b) <i>Klebsiella pneumoniae</i> ; c) <i>Staphylococcus saprophyticus</i> ; d) <i>Escherichia coli</i> ; e) <i>Staphylococcus aureus</i> bacteria compared with 0.001 g/ml silver sulfadiazine for 24 h ..... | S4   |
| <b>Table S3.</b> Width of inhibition zones for chitosan-AgIO <sub>3</sub> bionanocomposite against a) <i>Pseudomonas aeruginosa</i> ; b) <i>Klebsiella pneumoniae</i> ; c) <i>Staphylococcus saprophyticus</i> ; d) <i>Escherichia coli</i> ; e) <i>Staphylococcus aureus</i> bacteria compared with 0.01 g/ ml penicillin for 24 h.....           | S5   |
| <b>Table S4.</b> Width of inhibition zones for chitosan-AgIO <sub>3</sub> bionanocomposite against a) <i>Pseudomonas aeruginosa</i> ; b) <i>Klebsiella pneumoniae</i> ; c) <i>Escherichia coli</i> bacteria compared with 0.01 g/ ml silver sulfadiazine for 24 h .....                                                                            | S6   |
| <b>Figure S1.</b> Inhibition zones of chitosan-AgIO <sub>3</sub> against a) <i>Pseudomonas aeruginosa</i> ; b) <i>Klebsiella pneumoniae</i> ; c) <i>Staphylococcus saprophyticus</i> ; d) <i>Escherichia coli</i> ; e) <i>Staphylococcus aureus</i> bacteria for 24 h compared with 0.01 g/ml penicillin .....                                     | S7   |
| <b>Figure S2.</b> Inhibition zones of chitosan-AgIO <sub>3</sub> against a) <i>Pseudomonas aeruginosa</i> ; b) <i>Klebsiella pneumoniae</i> ; c) <i>Escherichia coli</i> bacteria for 24 h compared with 0.01 g/ml silver sulfadiazine .....                                                                                                       | S8   |

---

**Table S1.** Width of inhibition zones for chitosan-AgIO<sub>3</sub> bionanocomposite against a) *Pseudomonas aeruginosa*; b) *Klebsiella pneumoniae*; c) *Staphylococcus saprophyticus*; d) *Escherichia coli*; e) *Staphylococcus aureus* bacteria compared with 0.001 g/ml penicillin for 24 h

| Bacteria                            | Inhibition zone (diameter), mm |                         |
|-------------------------------------|--------------------------------|-------------------------|
|                                     | Bionanocomposite (0.01 g)      | Penicillin (0.001 g/ml) |
| <i>Pseudomonas aeruginosa</i>       | 4                              | 0.5                     |
| <i>Klebsiella pneumoniae</i>        | 2                              | 5                       |
| <i>Staphylococcus saprophyticus</i> | 10                             | 19                      |
| <i>Escherichia coli</i>             | 7                              | 2                       |
| <i>Staphylococcus aureus</i>        | 7                              | 17                      |

**Table S2.** Width of inhibition zones for chitosan-AgIO<sub>3</sub> bionanocomposite against a) *Pseudomonas aeruginosa*; b) *Klebsiella pneumoniae*; c) *Staphylococcus saprophyticus*; d) *Escherichia coli*; e) *Staphylococcus aureus* bacteria compared with 0.001 g/ml silver sulfadiazine for 24 h

| Bacteria                            | Inhibition zone (diameter), mm |                                  |
|-------------------------------------|--------------------------------|----------------------------------|
|                                     | Bionanocomposite (0.01 g)      | Silver sulfadiazine (0.001 g/ml) |
| <i>Pseudomonas aeruginosa</i>       | 5                              | 2                                |
| <i>Klebsiella pneumoniae</i>        | 2                              | 1.5                              |
| <i>Staphylococcus saprophyticus</i> | 5                              | 13                               |
| <i>Escherichia coli</i>             | 7                              | 3                                |
| <i>Staphylococcus aureus</i>        | 5.5                            | 14                               |

**Table S3.** Width of inhibition zones for chitosan-AgIO<sub>3</sub> bionanocomposite against a) *Pseudomonas aeruginosa*; b) *Klebsiella pneumoniae*; c) *Staphylococcus saprophyticus*; d) *Escherichia coli*; e) *Staphylococcus aureus* bacteria compared with 0.01 g/ml penicillin for 24 h

| Bacteria                            | Inhibition zone (diameter), mm |                        |
|-------------------------------------|--------------------------------|------------------------|
|                                     | Bionanocomposite (0.01 g)      | penicillin (0.01 g/ml) |
| <i>Pseudomonas aeruginosa</i>       | 4                              | 1.5                    |
| <i>Klebsiella pneumoniae</i>        | 3                              | 8                      |
| <i>Staphylococcus saprophyticus</i> | 6                              | 21                     |
| <i>Escherichia coli</i>             | 6                              | 8                      |
| <i>Staphylococcus aureus</i>        | 6                              | 22                     |

**Table S4.** Width of inhibition zones for chitosan-AgIO<sub>3</sub> bionanocomposite against a) *Pseudomonas aeruginosa*; b) *Klebsiella pneumoniae*; c) *Escherichia coli* bacteria compared with 0.01 g/ml silver sulfadiazine for 24 h

| Bacteria                      | Inhibition zone (diameter), mm |                                 |
|-------------------------------|--------------------------------|---------------------------------|
|                               | Bionanocomposite (0.01 g)      | Silver sulfadiazine (0.01 g/ml) |
| <i>Pseudomonas aeruginosa</i> | 4                              | 12                              |
| <i>Klebsiella pneumoniae</i>  | 2                              | 2                               |
| <i>Escherichia coli</i>       | 5                              | 13                              |

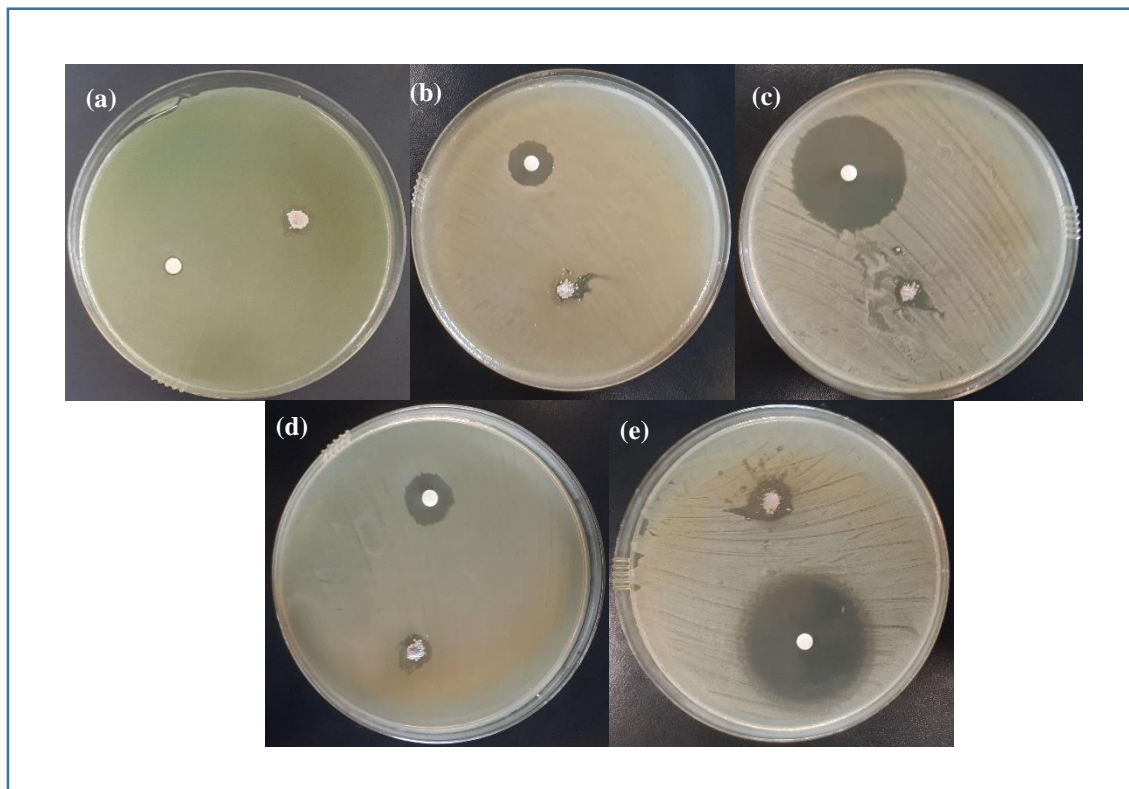

**Figure S1.** Inhibition zones of chitosan-AgIO<sub>3</sub> against a) *Pseudomonas aeruginosa*; b) *Klebsiella pneumoniae*; c) *Staphylococcus saprophyticus*; d) *Escherichia coli*; e) *Staphylococcus aureus* bacteria for 24 h compared with 0.01 g/ml penicillin

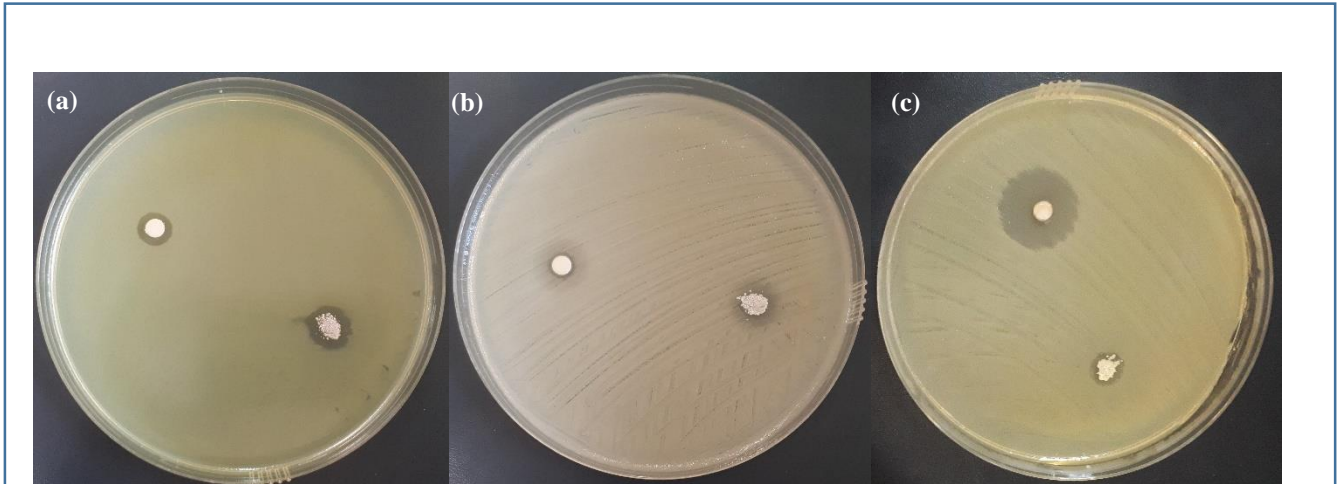

**Figure S2.** Inhibition zones of chitosan-AgIO<sub>3</sub> against a) *Pseudomonas aeruginosa*; b) *Klebsiella pneumoniae*; c) *Escherichia coli* bacteria for 24 h compared with 0.01 g/ml silver sulfadiazine
